# Supplementary material for: Reduction degree and property study of graphene nanosheets prepared with different reducing agents and their applicability as a carrier of the Ru(phen)3Cl2luminescent sensor for DNA detection
Source: Royal Society of Chemistry journal article supplement (doi:10.1039/c5ra02376a), 2015-01-01
Supplement: c5ra02376a1.pdf [file c5ra02376a1.pdf]

## Supporting Information (SI)

### Reduction degree and property study of graphene nanosheets prepared with different reducing agents and their applicability of being a carrier of **Ru(phen)<sub>3</sub>Cl<sub>2</sub> luminescent sensor for DNA detection**

*Hongjuan Li, Jia Wen, Ruijin Yu, Caihui Bai, Yongqian Xu, Shiguo Sun\**

College of Science, Northwest A&F University, Yangling, Shaanxi, 712100, P. R. China

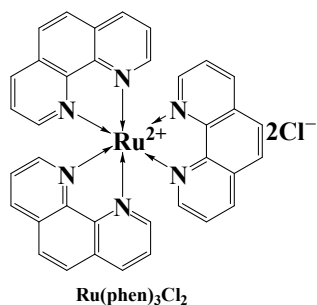

**Fig. S1** The structures of Ru(phen)<sub>3</sub>Cl<sub>2</sub>.

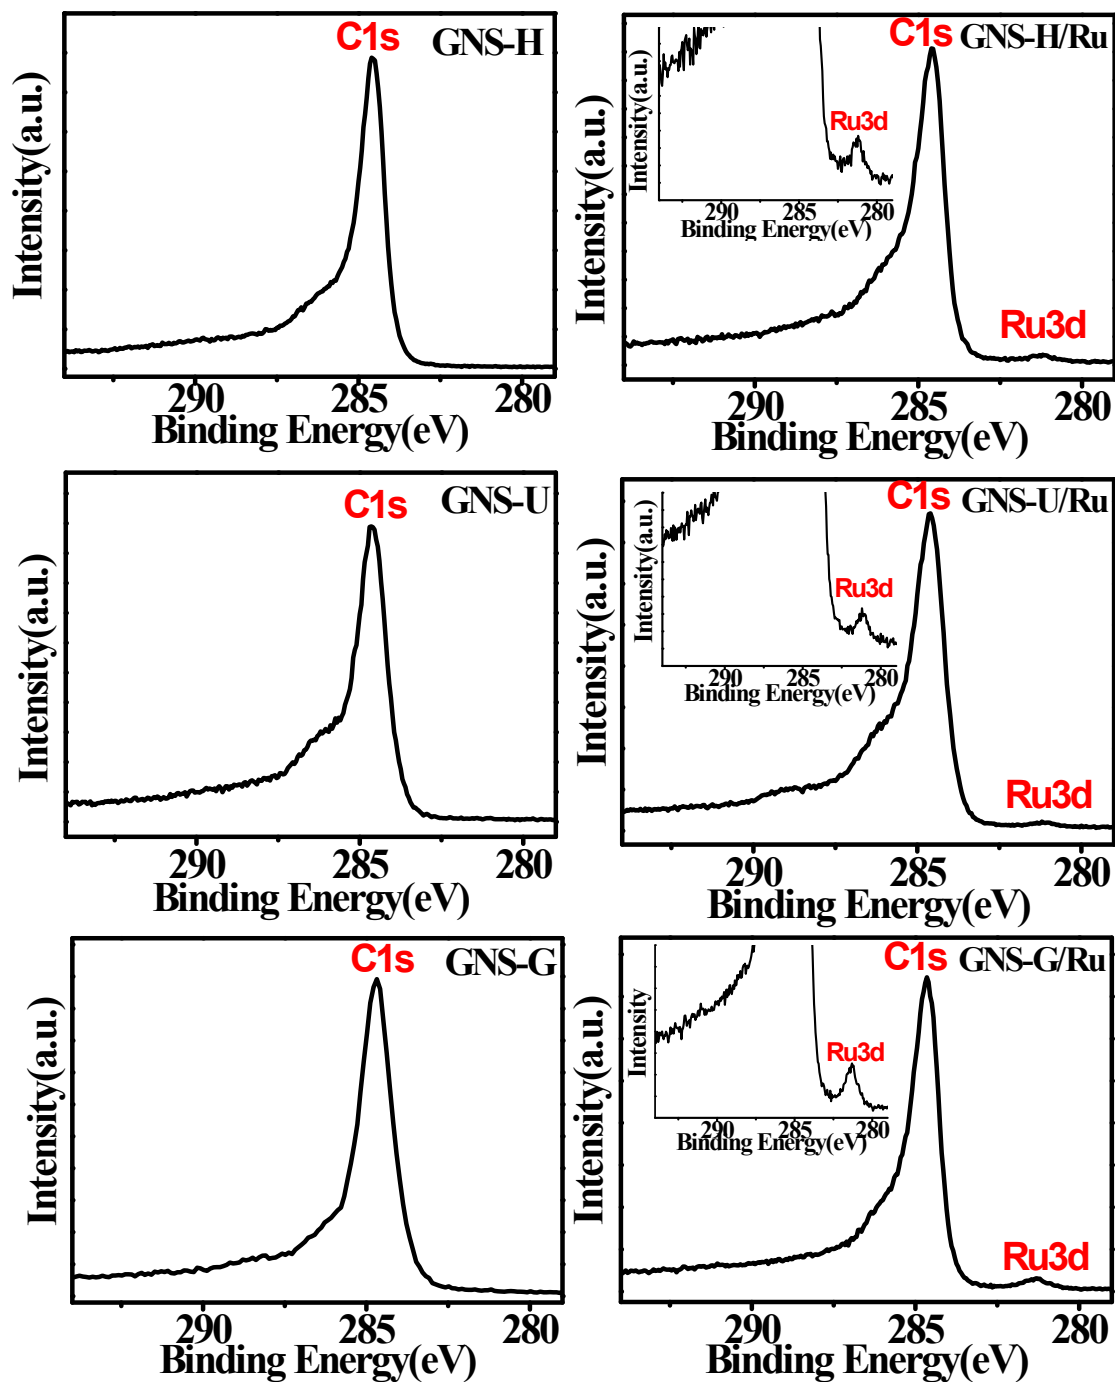

Fig. S2 C1s XPS spectra of the GNS samples and GNS/Ru(phen)<sub>3</sub>Cl<sub>2</sub> (Ru). Inset shows the magnification of the Ru3d XPS spectra.

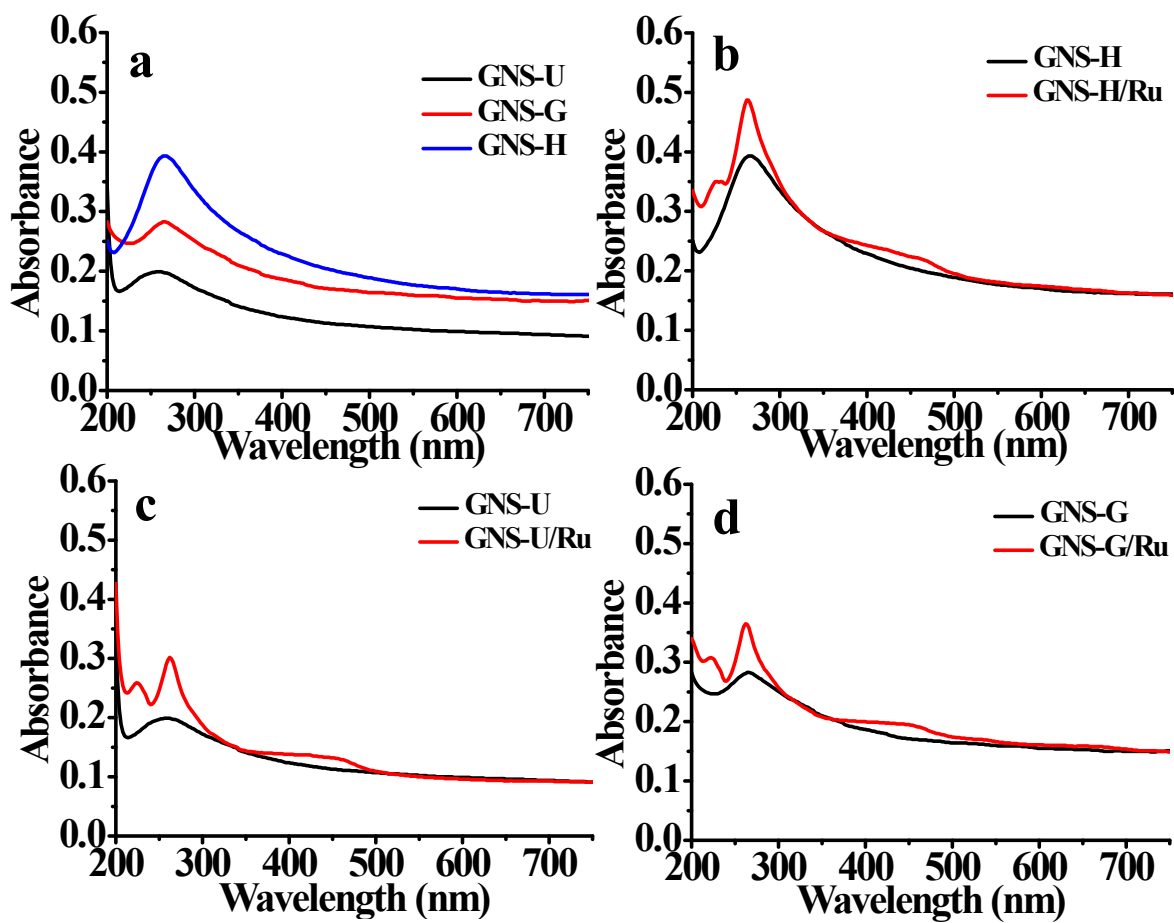

Fig. S3 UV-vis absorption spectra of the GNS samples and GNS/Ru(phen)<sub>3</sub>Cl<sub>2</sub> (Ru).

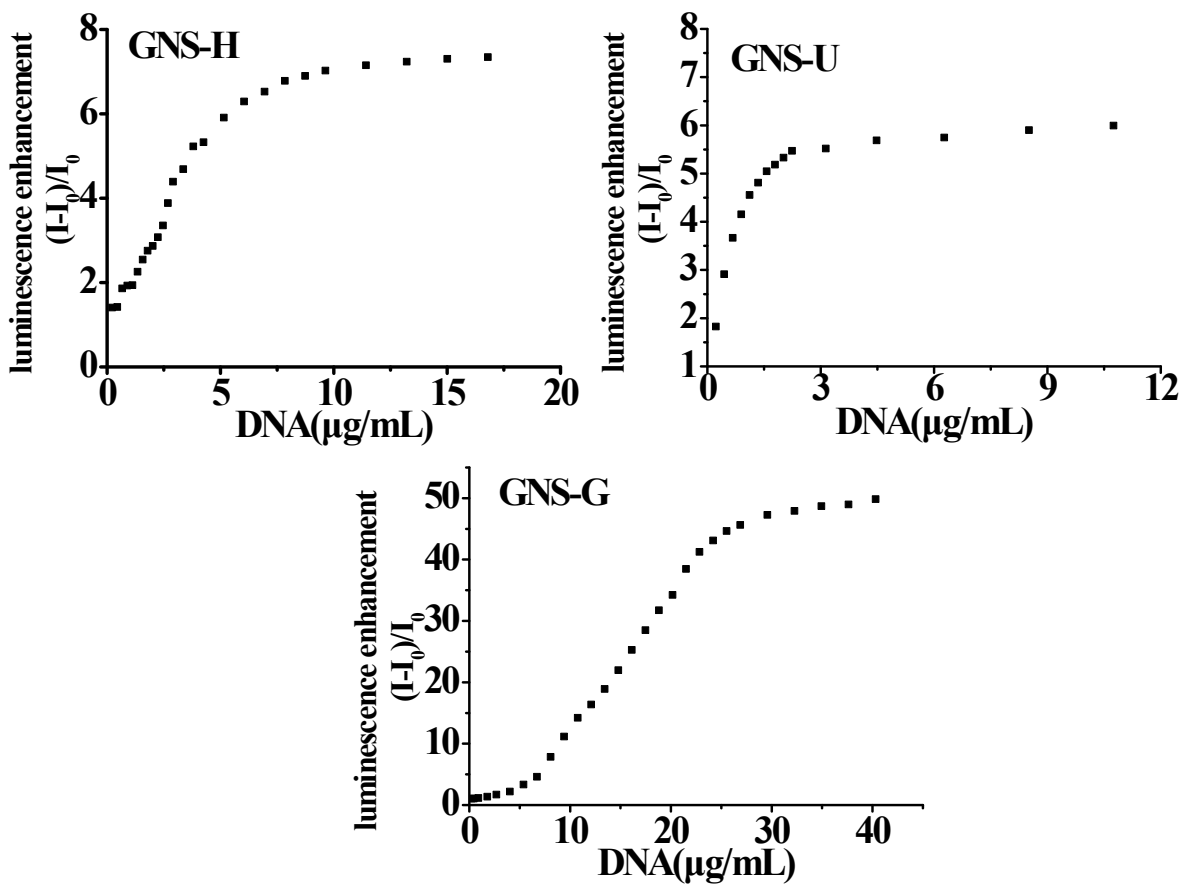

**Fig. S4** Luminescence response of the  $\text{Ru}(\text{phen})_3\text{Cl}_2$  sensor upon addition of different concentration of CT DNA in the presence of a certain concentration of GNS (6.9  $\mu\text{g}/\text{mL}$  GNS-H, 5.6  $\mu\text{g}/\text{mL}$  GNS-U, 5.3  $\mu\text{g}/\text{mL}$  GNS-G),  $\text{Ex}=464$  nm.

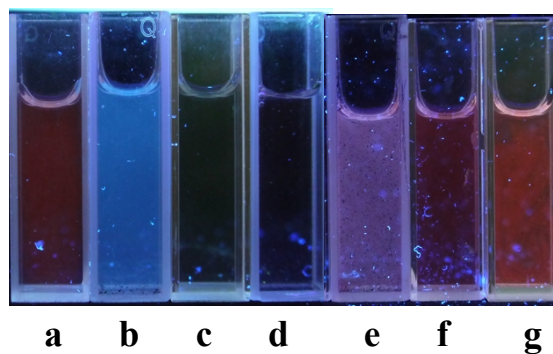

**Fig. S5** Optical image of (a)  $0.49 \mu\text{M Ru}(\text{phen})_3\text{Cl}_2$  (Ru); (b) Ru+ $5.3 \mu\text{g/mL GNS-G}$ ; (c) Ru+ $6.9 \mu\text{g/mL GNS-H}$ ; (d) Ru+ $5.6 \mu\text{g/mL GNS-U}$ ; (e) Ru+ $5.3 \mu\text{g/mL GNS-G}$ + $40.3 \mu\text{g/mL DNA}$ ; (f) Ru+ $6.9 \mu\text{g/mL GNS-H}$  + $16.8 \mu\text{g/mL DNA}$ ; (g) Ru+ $5.6 \mu\text{g/mL GNS-U}$  + $10.7 \mu\text{g/mL DNA}$ . All the photos were taken under a hand-held UV lamp.
